# Supplementary material
Source: publisher site journal article supplement (https://www.spandidos-publications.com/2783/downloadSupplementary)

Figure S1. Expression of miR-383 and PRDX3 after transfection with pre-/sh-PRDX3 vectors, vector NC, miR-383 mimics/inhibitor, miR-NC or inhibitor NC. (A) Expression level of miR-383; (B) mRNA expression level of PRDX3. n=3; \*P<0.05. PRDX3, peroxiredoxin 3; miR, microRNA; sh, short hairpin; NC, negative control.

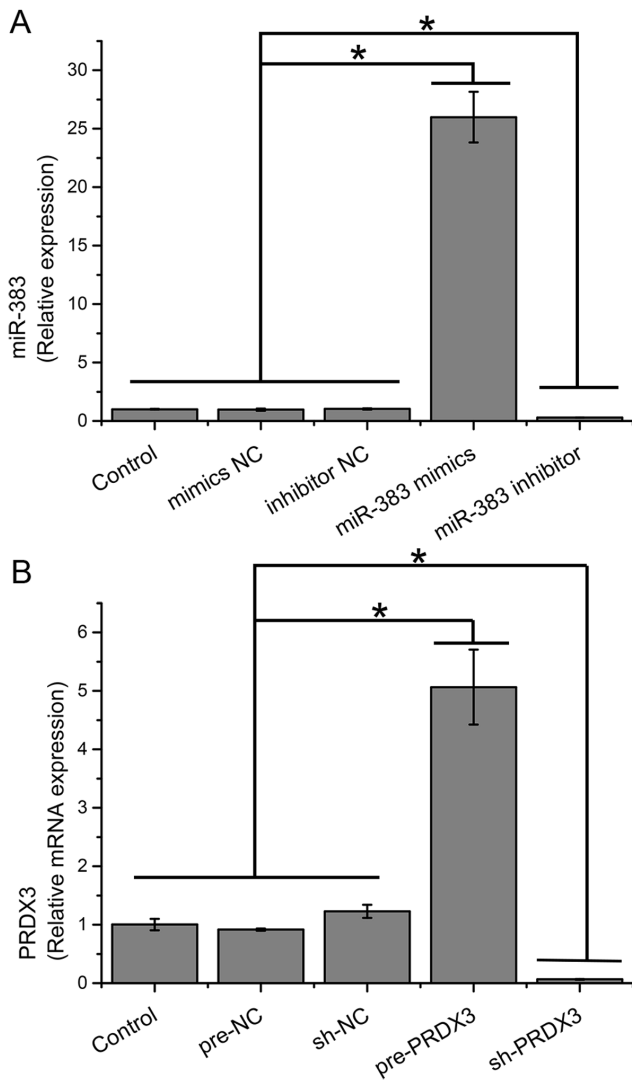

Supplement: Supplementary file 1 [file downloadSupplementary]
